# Supplementary material
Source: PubMed Central journal article supplement (PMC8515258)
Supplement: jamacardiol-e214027-s001.pdf [file jamacardiol-e214027-s001.pdf]

## Supplementary Online Content

Felker GM, Solomon SD, Claggett B, et al. Assessment of omecamtiv mecarbil for the treatment of patients with severe heart failure: a post hoc analysis of data from the GALACTIC-HF randomized clinical trial. *JAMA Cardiol*. Published online October 13, 2021. doi:10.1001/jamacardio.2021.4027

**eTable 1.** Baseline Characteristics by Severe Heart Failure Status

**eTable 2.** Tolerability by Treatment Group and Severe Heart Failure Status

**eFigure.** Venn Diagram of Groups Defined by Specific Severe Heart Failure Criteria

This supplementary material has been provided by the authors to give readers additional information about their work.

**eTable 1.** Baseline Characteristics by Severe Heart Failure Status

|                                             | Severe HF<br>n=2258 | Not Severe HF<br>n=5974 |         |
|---------------------------------------------|---------------------|-------------------------|---------|
| <i>Demographics</i>                         |                     |                         |         |
| Age - yr                                    | 64.5 ± 11.6         | 64.5 ± 11.3             | p=0.75  |
| Sex, Female                                 | 477 (21.1%)         | 1272 (21.3%)            | p=0.87  |
| <i>Race</i>                                 |                     |                         |         |
| Asian                                       | 153 (6.8%)          | 557 (9.3%)              | p<0.001 |
| Black                                       | 177 (7.8%)          | 385 (6.4%)              |         |
| Other                                       | 129 (5.7%)          | 434 (7.3%)              |         |
| White                                       | 1799 (79.7%)        | 4598 (77.0%)            |         |
| <i>Geographic Region</i>                    |                     |                         |         |
| Asia                                        | 141 (6.2%)          | 529 (8.9%)              | p<0.001 |
| Eastern Europe/Russia                       | 810 (35.9%)         | 1871 (31.3%)            |         |
| Latin America                               | 324 (14.3%)         | 1250 (20.9%)            |         |
| US And Canada                               | 434 (19.2%)         | 952 (15.9%)             |         |
| Western Europe/South Africa/Australasia     | 549 (24.3%)         | 1372 (23.0%)            |         |
| Randomization Setting: In-patient           | 937 (41.5%)         | 1147 (19.2%)            |         |
| <i>Clinical Characteristics</i>             |                     |                         |         |
| Atrial Fibrillation or Flutter at Screening | 717 (31.8%)         | 1528 (25.6%)            | p<0.001 |
| Hypertension History                        | 1573 (69.7%)        | 4211 (70.5%)            | p=0.46  |
| Type 2 diabetes mellitus                    | 954 (42.2%)         | 2355 (39.4%)            | p=0.020 |
| History of stroke                           | 240 (10.6%)         | 514 (8.6%)              | p=0.004 |
| Ischemic heart failure etiology             | 1213 (53.7%)        | 3202 (53.6%)            | p=0.92  |
| History of Myocardial Infarction            | 960 (42.5%)         | 2475 (41.4%)            | p=0.37  |
| LVEF - %                                    | 23.4 ± 5.2          | 27.8 ± 6.2              | p<0.001 |
| <i>NYHA Classification</i>                  |                     |                         |         |
| Class II                                    | 0 (0.0%)            | 4368 (73.1%)            | p<0.001 |
| Class III                                   | 2085 (92.3%)        | 1531 (25.6%)            |         |
| Class IV                                    | 173 (7.7%)          | 75 (1.3%)               |         |
| <i>KCCQ Total Symptom Score</i>             |                     |                         |         |
| Outpatient                                  | 56.2 [36.5, 77.1]   | 74.0 [54.2, 90.6]       | p<0.001 |
| Inpatient                                   | 63.5 [44.8, 83.3]   | 77.1 [58.3, 91.7]       | p<0.001 |
| SBP — mmHg                                  | 47.4 [29.2, 66.7]   | 57.3 [37.5, 76.0]       | p<0.001 |
| Heart rate — beats/min                      | 113.8 ± 15.0        | 117.5 ± 15.4            | p<0.001 |
| NT-proBNP — pg/mL                           | 74.3 ± 12.5         | 71.7 ± 11.9             | p<0.001 |
| Cardiac Troponin I — ng/L                   | 2804 [1450, 5795]   | 1768 [878, 3521]        | p<0.001 |
| eGFR — mL/min/1.73m <sup>2</sup>            | 34 [19, 64]         | 24 [12, 47]             | p<0.001 |
|                                             | 55.1 [41.8, 69.9]   | 60.0 [45.4, 75.5]       | p<0.001 |

| <i>Heart Failure Therapies</i>         |              |              |         |
|----------------------------------------|--------------|--------------|---------|
| ACEi, ARB or ARNi                      | 1873 (82.9%) | 5286 (88.5%) | p<0.001 |
| ARNi                                   | 447 (19.8%)  | 1154 (19.3%) | p=0.62  |
| BB                                     | 2093 (92.7%) | 5670 (94.9%) | p<0.001 |
| MRA                                    | 1768 (78.3%) | 4629 (77.5%) | p=0.43  |
| SGLT2 Inhibitors                       | 50 (2.2 %)   | 168 (2.8 %)  | p=0.13  |
| Ivabradine                             | 188 (8.3 %)  | 345 (5.8 %)  | p<0.001 |
| Digitalis glycosides                   | 436 (19.3%)  | 949 (15.9%)  | p<0.001 |
| Cardiac Resynchronization Therapy      | 372 (16.5%)  | 786 (13.2%)  | p<0.001 |
| Implantable Cardioverter Defibrillator | 807 (35.7%)  | 1807 (30.2%) | p<0.001 |

LVEF = left ventricular ejection fraction, NYHA = New York Heart Association, KCCQ = Kansas City Cardiomyopathy Questionnaire, SBP = systolic blood pressure, NT-proBNP = amino-terminal-b-type natriuretic peptide, eGFR = estimated glomerular filtration rate, ACEi = angiotensin converting enzyme inhibitor, ARB = angiotensin receptor blocker, ARNi = angiotensin receptor neprilysin inhibitor, BB = beta blocker, MRA = mineralocorticoid receptor antagonists, SGLT2 = sodium glucose co-transport-2

**eTable 2.** Tolerability by Treatment Group and Severe Heart Failure Status

| Variable                                                      | Week 0            |                   | Week 24          |                  | Ratio or Difference | p-value |
|---------------------------------------------------------------|-------------------|-------------------|------------------|------------------|---------------------|---------|
|                                                               | OM                | Placebo           | OM               | Placebo          |                     |         |
| <b>Severe HF</b>                                              |                   |                   |                  |                  |                     |         |
| Systolic BP (mm Hg) week 0 to 24 (n = 1849)                   | 114.0±15.3        | 113.5±14.7        | 116.7±17.3       | 116.0±17.7       | 0.6 (-0.7, 2.0)     | p=0.35  |
| Heart rate (beats/min) week 0 to 24 (n = 1850)                | 74.5±12.7         | 74.1±12.3         | 71.2±12.3        | 73.0±12.8        | -1.9 (-2.9, -0.8)   | p<0.001 |
| Potassium (mmol/L) week 0 to 24 (n = 1761)                    | 4.53±0.57         | 4.56±0.56         | 4.52±0.57        | 4.56±0.58        | -0.03 (-0.08, 0.02) | p=0.27  |
| Creatinine (mg/dl) week 0 to 24 (n = 1787)                    | 1.39±0.50         | 1.36±0.48         | 1.37±0.55        | 1.38±0.56        | -0.01 (-0.04, 0.02) | p=0.53  |
| NT-proBNP (pg/ml) week 0 to 24 [Ratio] (n = 1773)             | 2758 [1480, 5838] | 2834 [1416, 5732] | 1837 [856, 4043] | 2030 [918, 4703] | 0.86 (0.78, 0.95)   | p=0.002 |
| Troponin I (ng/L) week 0 to 24 [Median Difference] (n = 1613) | 34 [19, 63]       | 34 [19, 64]       | 41 [18, 74]      | 30 [14, 60]      | 5 (3, 7)            | p<0.001 |
| Troponin I (ng/L) week 0 to 24 [Ratio] (n = 1613)             | 34 [19, 63]       | 34 [19, 64]       | 41 [18, 74]      | 30 [14, 60]      | 1.27 (1.19, 1.37)   | p<0.001 |
| <b>Not Severe HF</b>                                          |                   |                   |                  |                  |                     |         |
| Systolic BP (mm Hg) week 0 to 24 (n = 5383)                   | 117.1±15.4        | 117.9±15.4        | 118.4±16.8       | 119.6±17.9       | -0.7 (-1.5, 0.1)    | p=0.07  |
| Heart rate (beats/min) week 0 to 24 (n = 5383)                | 71.7±12.0         | 71.6±11.9         | 69.6±11.3        | 71.0±11.6        | -1.4 (-2.0, -0.9)   | p<0.001 |
| Potassium (mmol/L) week 0 to 24 (n = 5251)                    | 4.57±0.51         | 4.57±0.51         | 4.56±0.51        | 4.55±0.52        | 0.01 (-0.02, 0.03)  | p=0.58  |
| Creatinine (mg/dl) week 0 to 24 (n = 5278)                    | 1.27±0.45         | 1.28±0.45         | 1.29±0.49        | 1.28±0.48        | 0.01 (-0.00, 0.03)  | p=0.14  |
| NT-proBNP (pg/ml) week 0 to 24 [Ratio] (n = 5261)             | 1753 [864, 3479]  | 1795 [893, 3540]  | 1274 [531, 2731] | 1391 [613, 2987] | 0.91 (0.86, 0.95)   | p<0.001 |

|                                                                            |             |             |             |             |                      |         |
|----------------------------------------------------------------------------|-------------|-------------|-------------|-------------|----------------------|---------|
| Troponin I (ng/L)<br>week 0 to 24<br>[Median Difference]<br>(n = 4758)     | 24 [12, 47] | 24 [12, 46] | 31 [13, 63] | 22 [10, 45] | 4 (3, 5)             | p<0.001 |
| Troponin I (ng/L)<br>week 0 to 24 [Ratio]<br>(n = 4758)                    | 25 [11, 47] | 25 [11, 47] | 31 [13, 63] | 22 [10, 45] | 1.24 (1.20,<br>1.29) | p<0.001 |
| BP = blood pressure, NT-proBNP = amino-terminal-b-type natriuretic peptide |             |             |             |             |                      |         |

**eFigure.** Venn Diagram of Groups Defined by Specific Severe Heart Failure Criteria

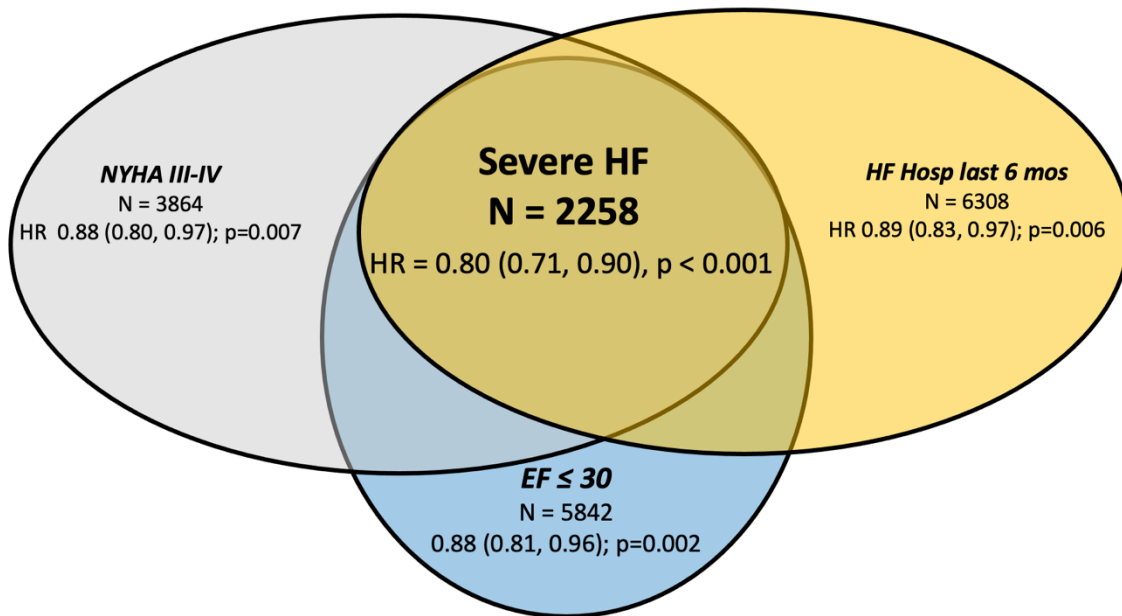

HR = hazard ratio for treatment with omecamtiv mecarbil vs placebo for the primary endpoint of time to first heart failure event or cardiovascular death.
